# Supplementary material
Source: HighWire-hosted journal article supplement (https://www.cmaj.ca/highwire/filestream/74759/field_highwire_adjunct_files/7/190757-res-4-at.pdf)

**Appendix 4 (as supplied by the authors): Descriptive statistics for the multimorbidity scores**

*Table A4.1. Descriptive statistics for the Cambridge Multimorbidity Scores (20-conditions) using validation dataset 1. Median and interquartile range for the patient-level sum of weights.*

| Outcome              | Median (IQR)  |
|----------------------|---------------|
| Consultations        | 0.66 (0-3.4)  |
| Mortality            | 0 (0-9.9)     |
| Emergency Admissions | 8.6 (0-71.8)  |
| General              | 0.08 (0-0.75) |

*Figure A4.1: Histograms showing the distribution of the Cambridge Multimorbidity Scores (20-conditions) in validation dataset 1.*

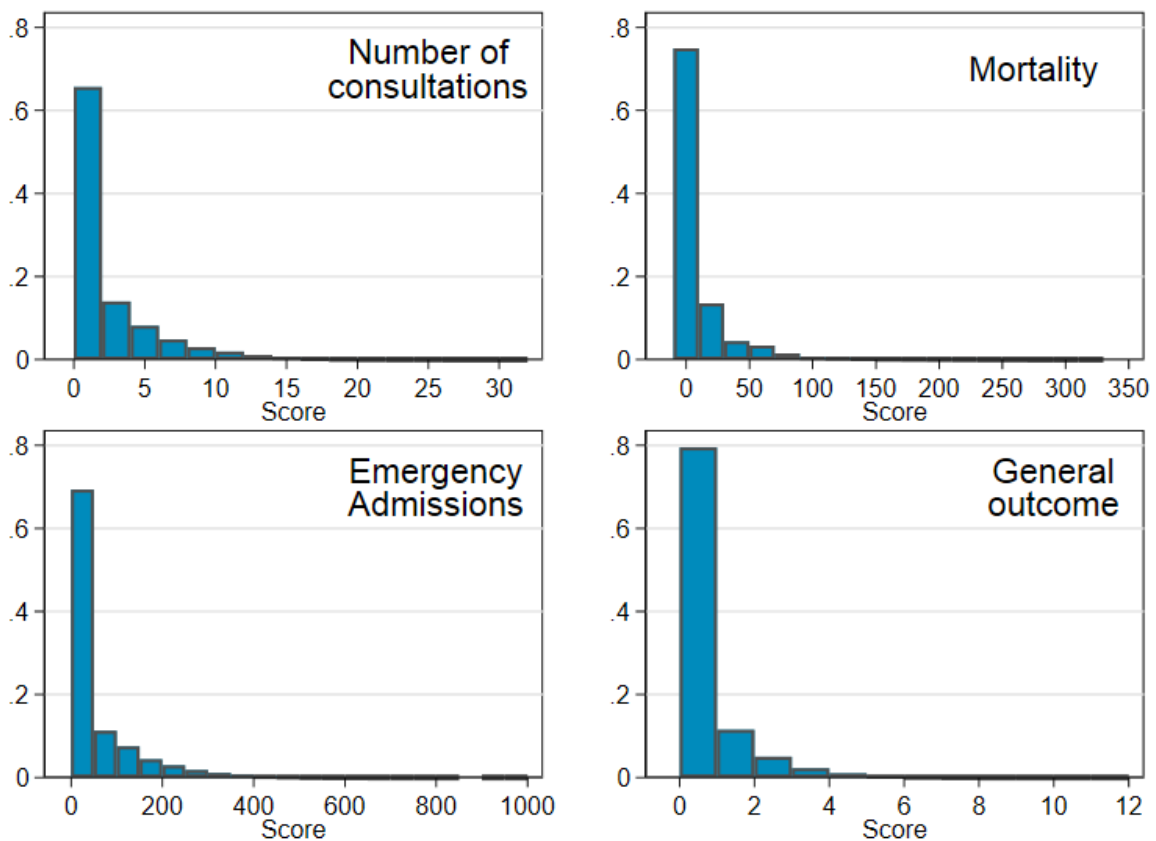

Supplement: 190757-res-4-at.pdf [file 190757-res-4-at.pdf]
